# Supplementary material for: Optimization of active layers for efficient binary organic solar cells
Source: Royal Society of Chemistry journal article supplement (doi:10.1039/d4cp03492a), 2024-11-29
Supplement: d4cp03492a1.pdf [file d4cp03492a1.pdf]

## Supporting Information

### Optimization of active layer for efficient binary organic solar cells

Yunjie Li, <sup>a,b,‡</sup> Beining Wang, <sup>b,‡</sup> Yaqian Yuan, <sup>c</sup> Lijun Chen, <sup>b</sup> Jianfei Fu, <sup>b</sup> Chong Geng, <sup>c</sup>

Junmin Wan, <sup>a,\*</sup> and Hai-Qiao Wang <sup>b,\*</sup>

<sup>a</sup> School of Materials Science and Engineering, Zhejiang Sci-Tech University, Hangzhou, China

<sup>b</sup> Zhejiang Engineering Research Center for Fabrication and Application of Advanced Photovoltaic Materials, School of Materials Science and Engineering, NingboTech University, Ningbo 315100, China

<sup>c</sup> School of Electronics and Information Engineering, Hebei University of Technology, Tianjin 300401, China.

\* Corresponding author: wwjm2001@126.com; hqwang@nbt.edu.cn (H.-Q. Wang)

‡ These authors have contributed equally to this paper.

Keywords: organic photovoltaic, active layer, morphology, solvent additive

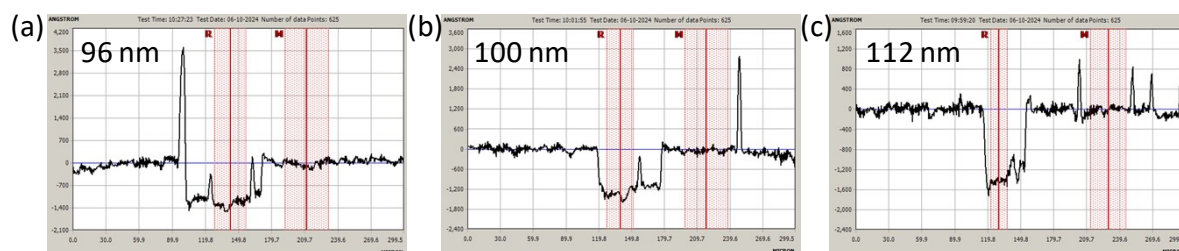

**Figure S1.** The thickness of the active layers applied in the devices.

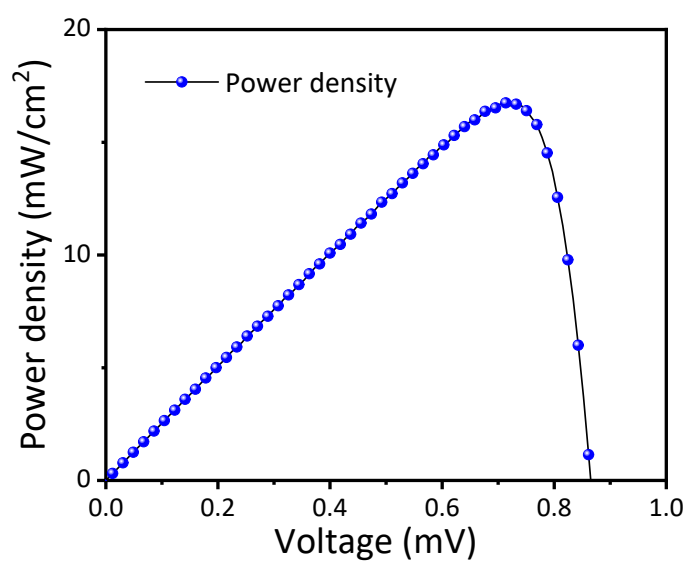

**Figure S2.** Power density output of the device with champion performance.

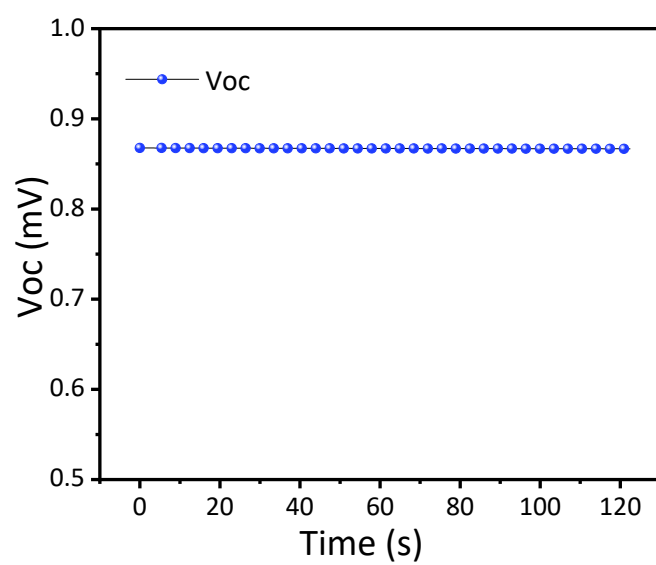

**Figure S3.** Voc steady-state output of the champion device.

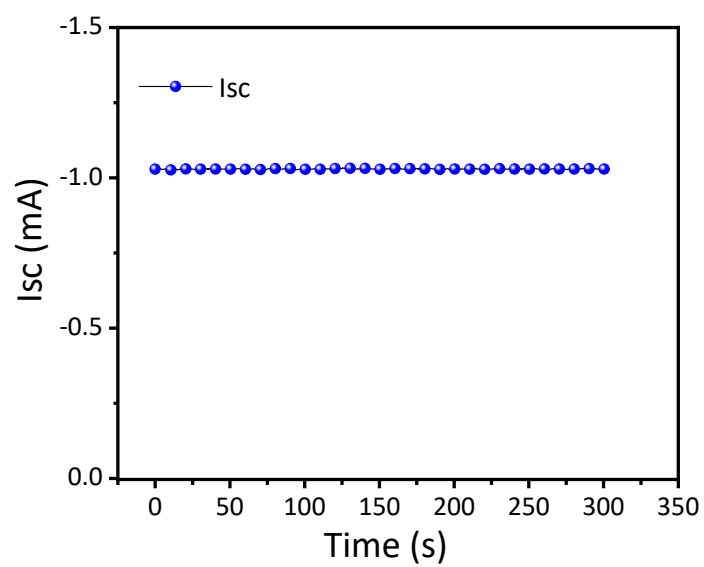

**Figure S4.** Steady-state current output of the champion device.

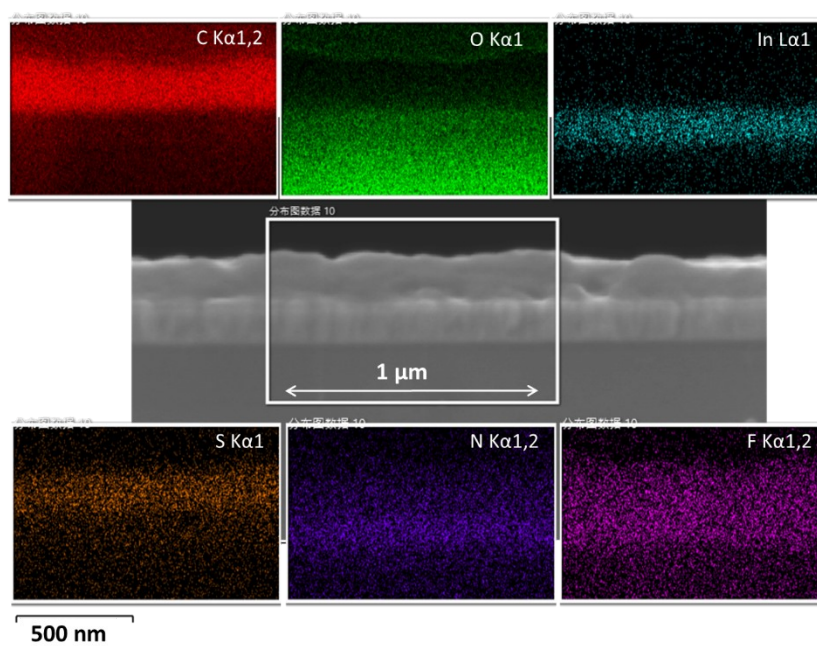

**Figure S5.** Elemental mapping of cross-section of the active layer with DIO.

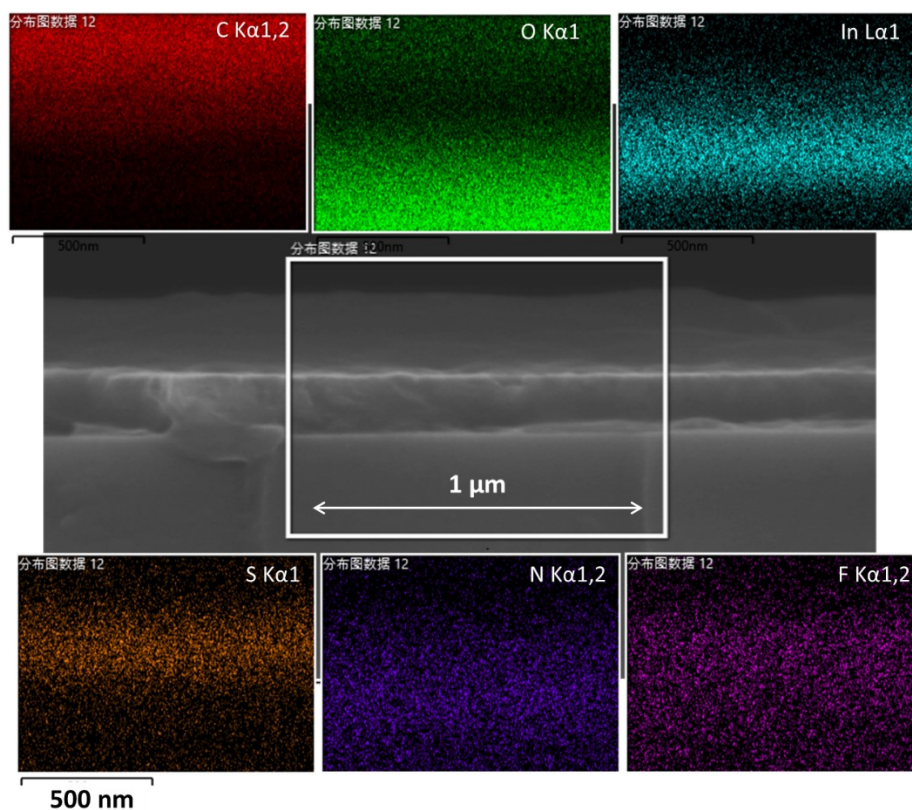

**Figure S6.** Elemental mapping of cross-section of the active layer without DIO.

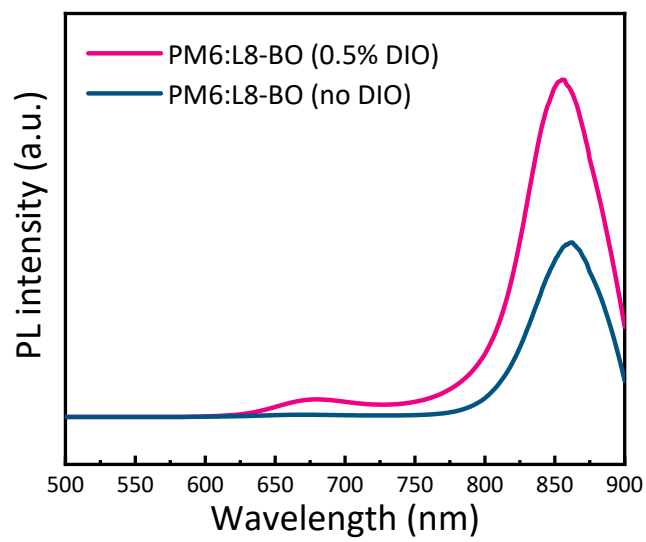

**Figure S7.** PL of the active layer with and without DIO. Excitation: 460 nm.

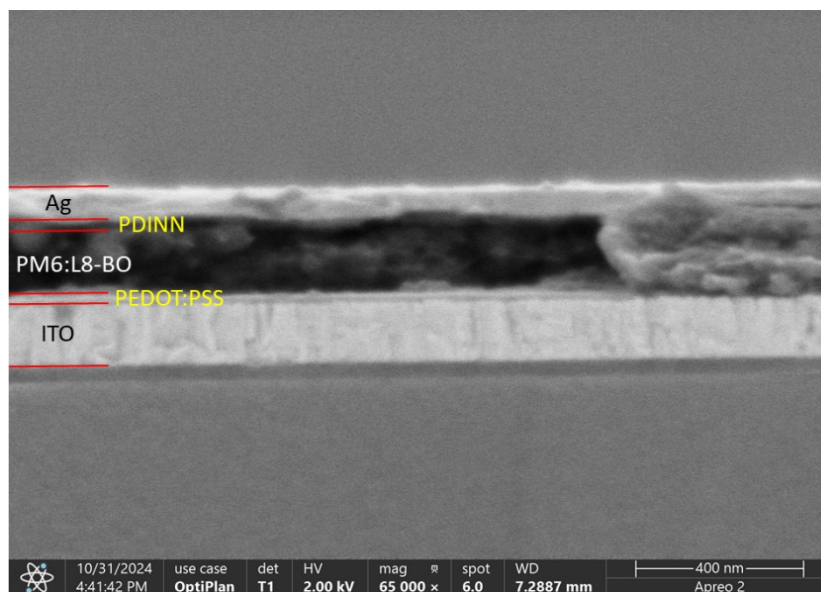

**Figure S8.** Cross-section SEM figure of the fabricated device. Confirming the device architecture of ITO/PEDOT:PSS/PM6:L8-BO/PDINN/Ag.
